# Supplementary material for: Inhibition of Arenaviruses by Combinations of Orally Available Approved Drugs
Source: PubMed Central journal article supplement (PMC8097473; doi:10.1128/aac.01146-20), 2021-03-18

## Supplemental Material FOR Publication

| Approved Drug | IC <sub>50</sub> PICV <sup>^</sup> | IC <sub>50</sub> LASV |
|---------------|------------------------------------|-----------------------|
| Arbidol       | 8.6                                | ~10.0 <sup>#</sup>    |
| Amodiaquine   | 4.5                                | nt                    |
| Aripiprazole  | 5.4                                | nt                    |
| Sertraline    | 3.7                                | 7.0 <sup>*</sup>      |
| Niclosamide   | <0.2                               | 0.2 <sup>*</sup>      |

**TABLE S1: Inhibition of infectious PICV and LASV by multiple approved drugs.** The Table shows IC<sub>50</sub> values for the indicated drugs tested against PICV-GFP in this study<sup>^</sup> and against LASV Josiah as described in (1)<sup>\*</sup> and (2)<sup>#</sup>. nt = not tested. For PICV-GFP, Vero E6 cells were treated with varying concentrations of drugs for 1 hour prior to infection with PICV-GFP at a MOI of 0.1. Forty-eight hours post-infection, cells were fixed, counterstained with DAPI, and GFP fluorescence measured on a Cytation 1 imaging system. Data represent averages of 4, 1, 2, 3, and 3 experiments for arbidol, amodiaquine, aripiprazole, sertraline, and niclosamide, respectively. For LASV, Vero E6 cells were treated with varying concentrations of drugs for 1 hour prior to infection with LASV Josiah at an MOI of 0.2. For both viruses, all conditions were conducted in triplicate.

13 **SUPPLEMENTAL FIGURE LEGENDS**

14 **Fig S1: Approved drugs evaluated for inhibition of arenaviruses.** Upon binding to  
15 cells, many enveloped viruses internalize and move into the cell (*i.e.*, traffic) to an acidic  
16 endosome. To deliver their genomes into cells, enveloped viruses must then fuse their  
17 membranes with the membrane of an endosome. As examples, the viral glycoproteins  
18 (GPs) of arenaviruses and filoviruses mediate the membrane fusion event (3), which is  
19 primed and triggered in the acidic environment of the endosome. The drugs tested in this  
20 study (aripiprazole, amodiaquine, niclosamide, arbidol, and sertraline) inhibit virus entry  
21 by acting at distinct steps of virus entry.

22

23 **Fig S2: Expression of arenavirus and filovirus glycoproteins in MLV pseudovirus**  
24 **stocks.** Viral GP expression was tested on non-concentrated pseudovirus stocks.  
25 Antibodies used are described in the Materials and Methods.

26

27 **Fig S3: Arbidol inhibits infection of MLV pseudoviruses bearing filovirus**  
28 **glycoproteins from MARV.** Vero cells were treated with varying concentrations of  
29 arbidol prior to infection with MLV pseudoviruses that enter cells via the glycoproteins of  
30 MARV Angola or MARV Musoke. Twenty-four hours later, luciferase activity was  
31 measured to quantify virus infection, and ATP levels were measured to quantify cell  
32 viability. Error bars represent standard deviations. Each condition was performed in  
33 triplicate, and each experiment was performed three times for each MARV pseudovirus.

34 For each virus, the data depict the averages and standard deviations across all  
35 experiments performed for that virus.

36

37 **Fig S4: Testing Setup for Drug Combination Assay 1.** See Materials and Methods for  
38 details of the procedure. Mock = mock-infected cells. Sol = solvent control. X = a defined  
39  $\mu\text{M}$  concentration of one-, two-, or three-drug combinations.

40

41 **Fig S5. Synergistic inhibition of MLV pseudoviruses bearing LASV and JUNV**  
42 **glycoproteins.** Dose-response curves (average values +/- SD) for the data presented in  
43 **Figs 3, 4 and Table 1.**

44

45 **Fig S6. Distribution of drug combination Bliss synergy scores.** 448,555 drug  
46 combinations (measured across 124 human cancer cell lines) were extracted from the  
47 DrugCombDB database (4), and Bliss Synergy Scores were calculated for each drug  
48 combinations. It was assumed that approximately 5% of all the combination experiments  
49 accounted for the most synergistic scores, and 5% confer the most antagonistic scores.  
50 The average synergy scores were quantiled (%) as follows: 5% = 12.3; 10% = 8.4; 25%  
51 = 3.8; 50% = 0.2; 75% = -3.3; 95% = -16.5.

## 52 REFERENCES

- 53 1. DeWald L, E.M. Morazzani, L.M. Johansen, L.T. Pierce, J.M. Grenier, B.M. Friedrich,  
54 C.M. Lear-Rooney, A.E. Piper, A.R. Stossel, C.J. Fitzpatrick, S.M. Stronsky, G.G. Olinger,  
55 and P.J. Glass. 2021. Identification of FDA-approved drugs with broad activity against  
56 high-consequence viral pathogens. manuscript in preparation.

- 57 2. Hulseberg CE, Feneant L, Szymanska-de Wijs KM, Kessler NP, Nelson EA, Shoemaker  
58 CJ, Schmaljohn CS, Polyak SJ, White JM. 2019. Arbidol and Other Low-Molecular-  
59 Weight Drugs That Inhibit Lassa and Ebola Viruses. *J Virol* 93.  
60 3. White JM, Whittaker GR. 2016. Fusion of Enveloped Viruses in Endosomes. *Traffic*  
61 17:593-614.  
62 4. Liu H, Zhang W, Zou B, Wang J, Deng Y, Deng L. 2020. DrugCombDB: a comprehensive  
63 database of drug combinations toward the discovery of combinatorial therapy. *Nucleic*  
64 *Acids Res* 48:D871-D881.  
65

Fig S1

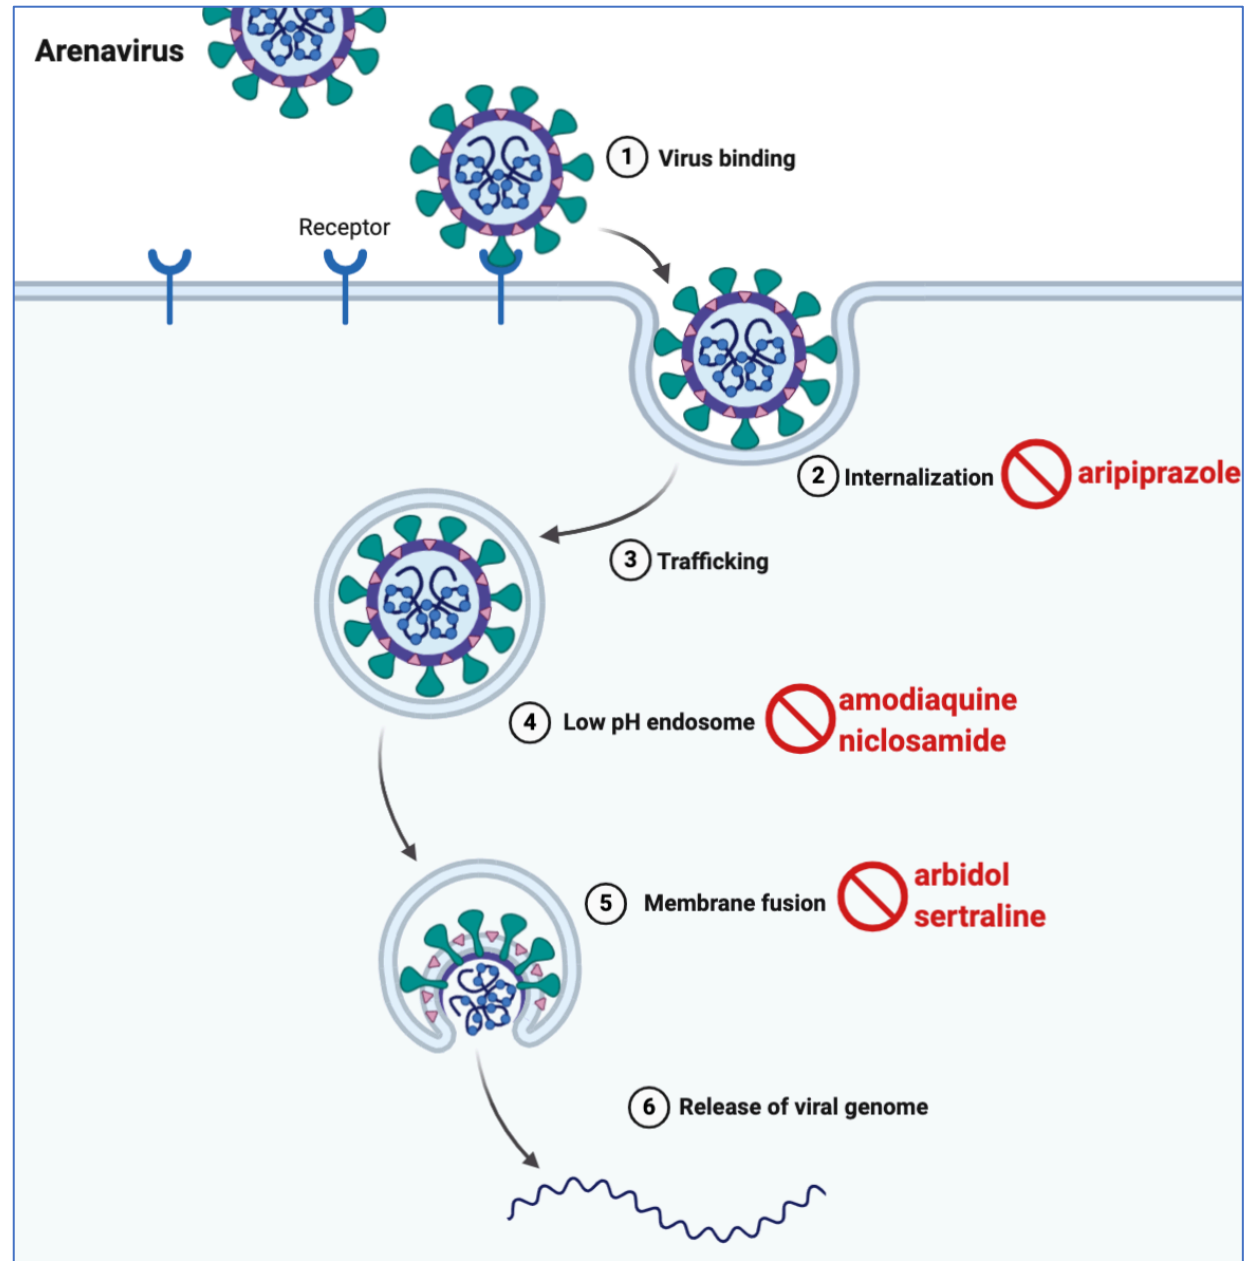

Fig S2

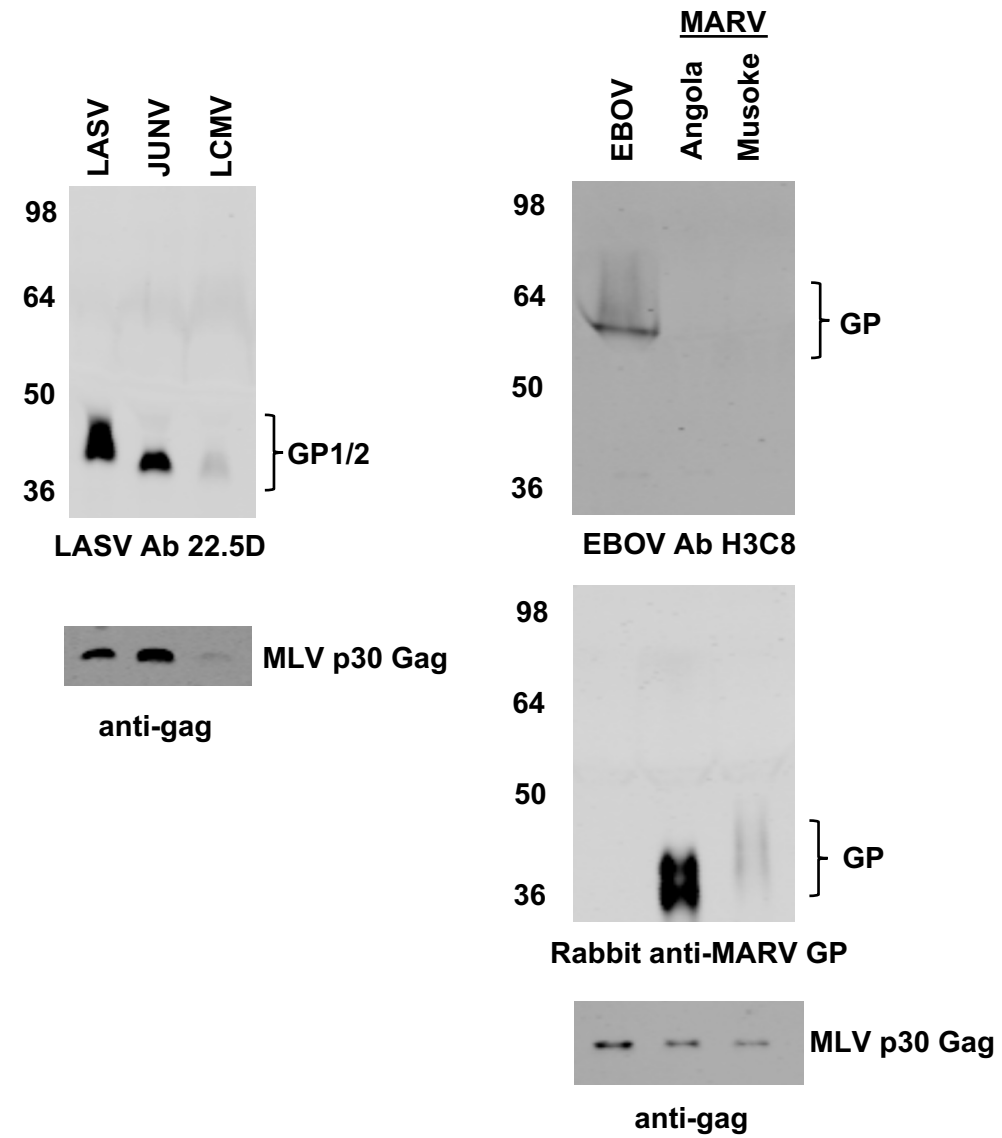

Fig S3

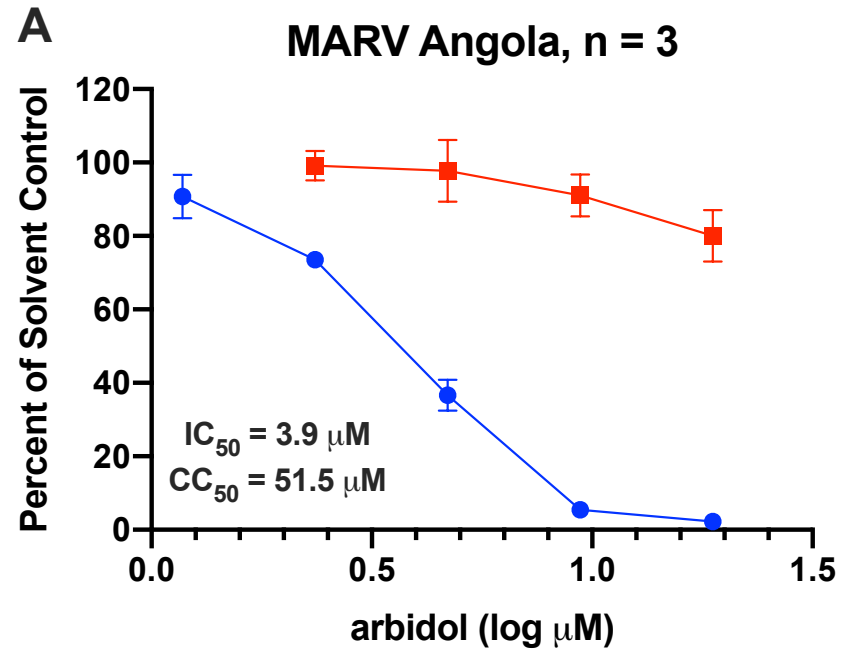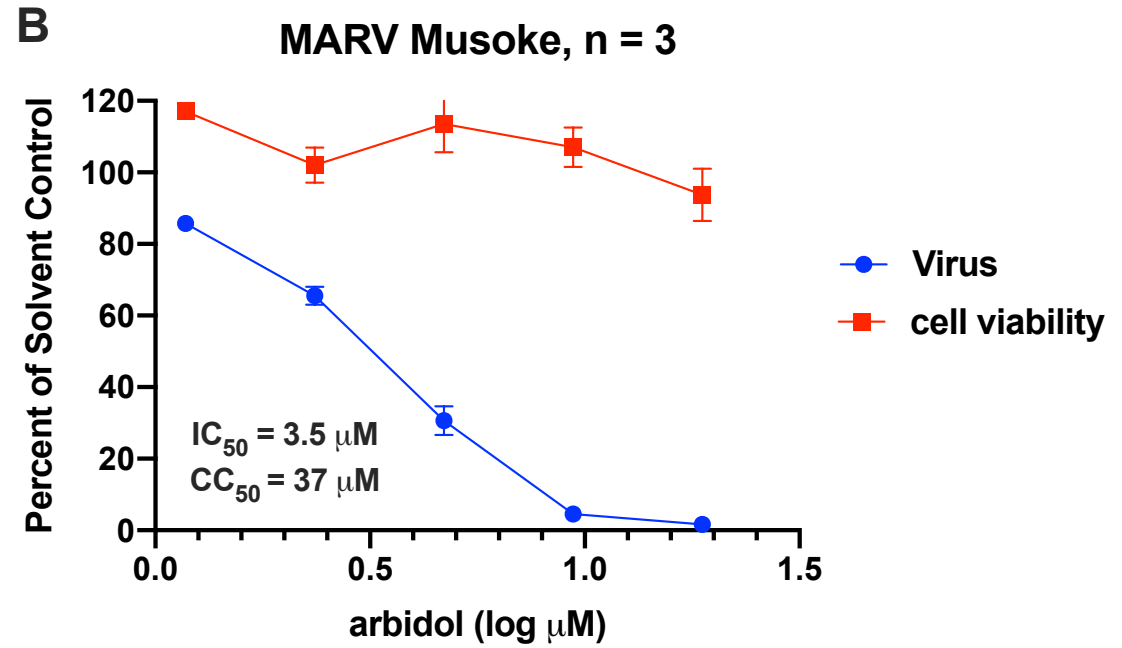





Fig S5

A

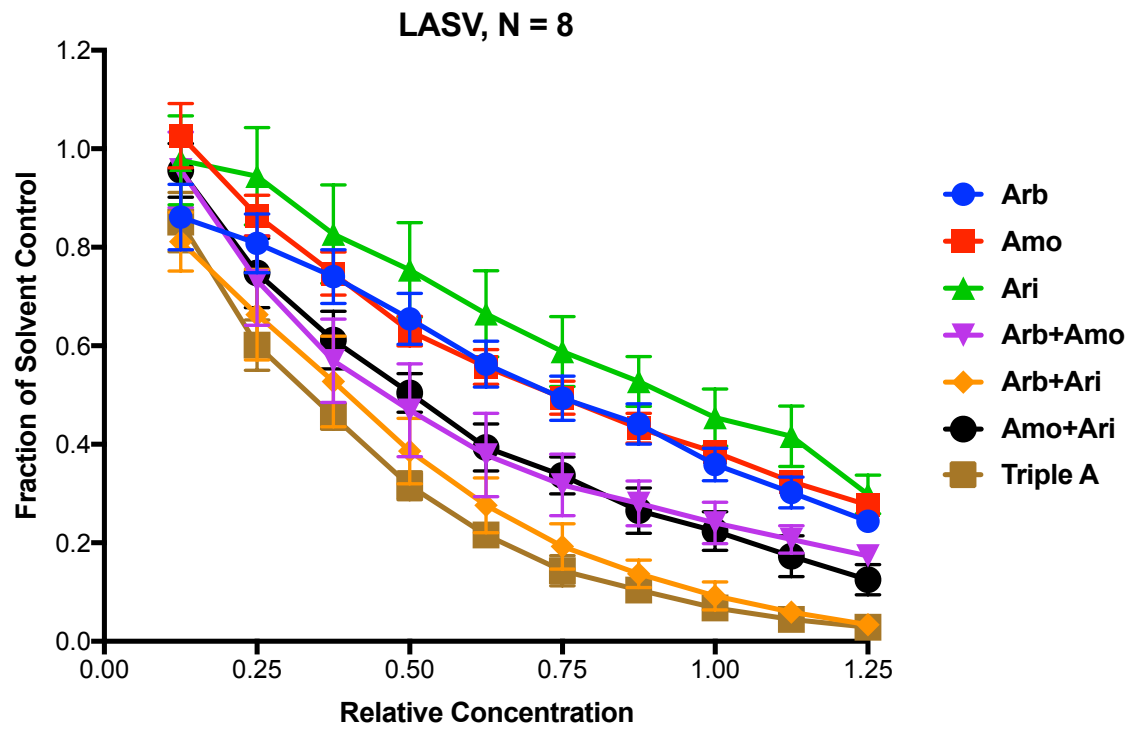

B

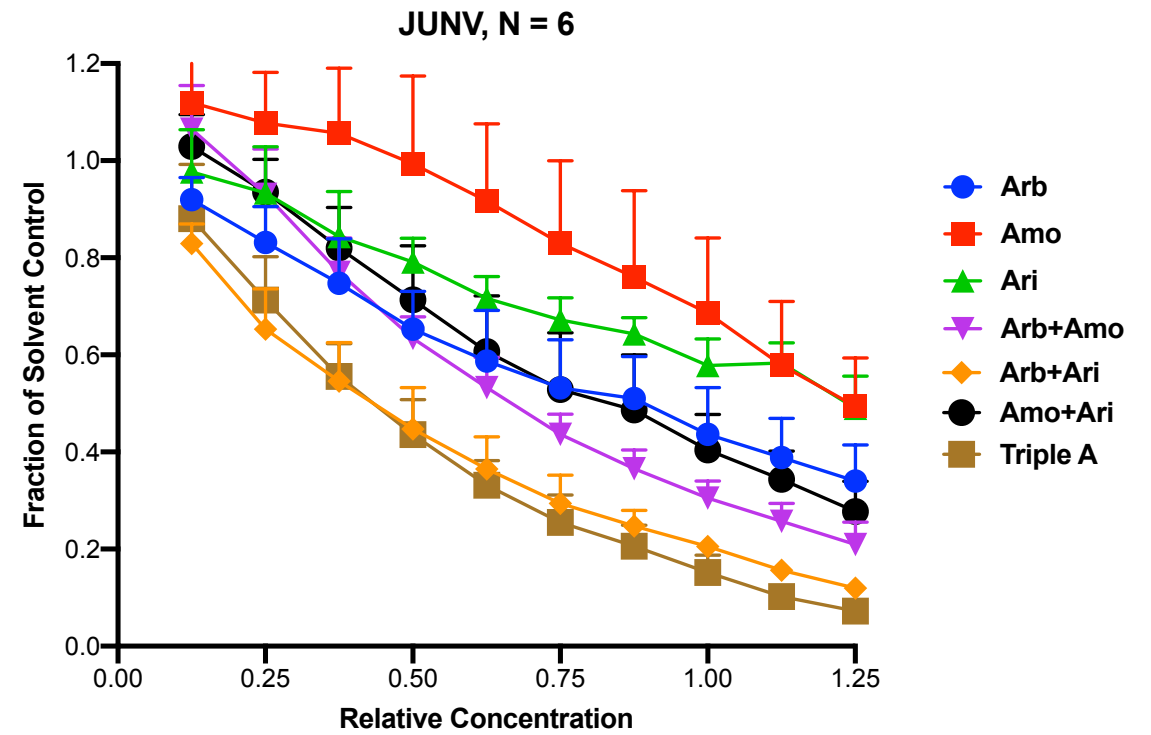

Fig S6

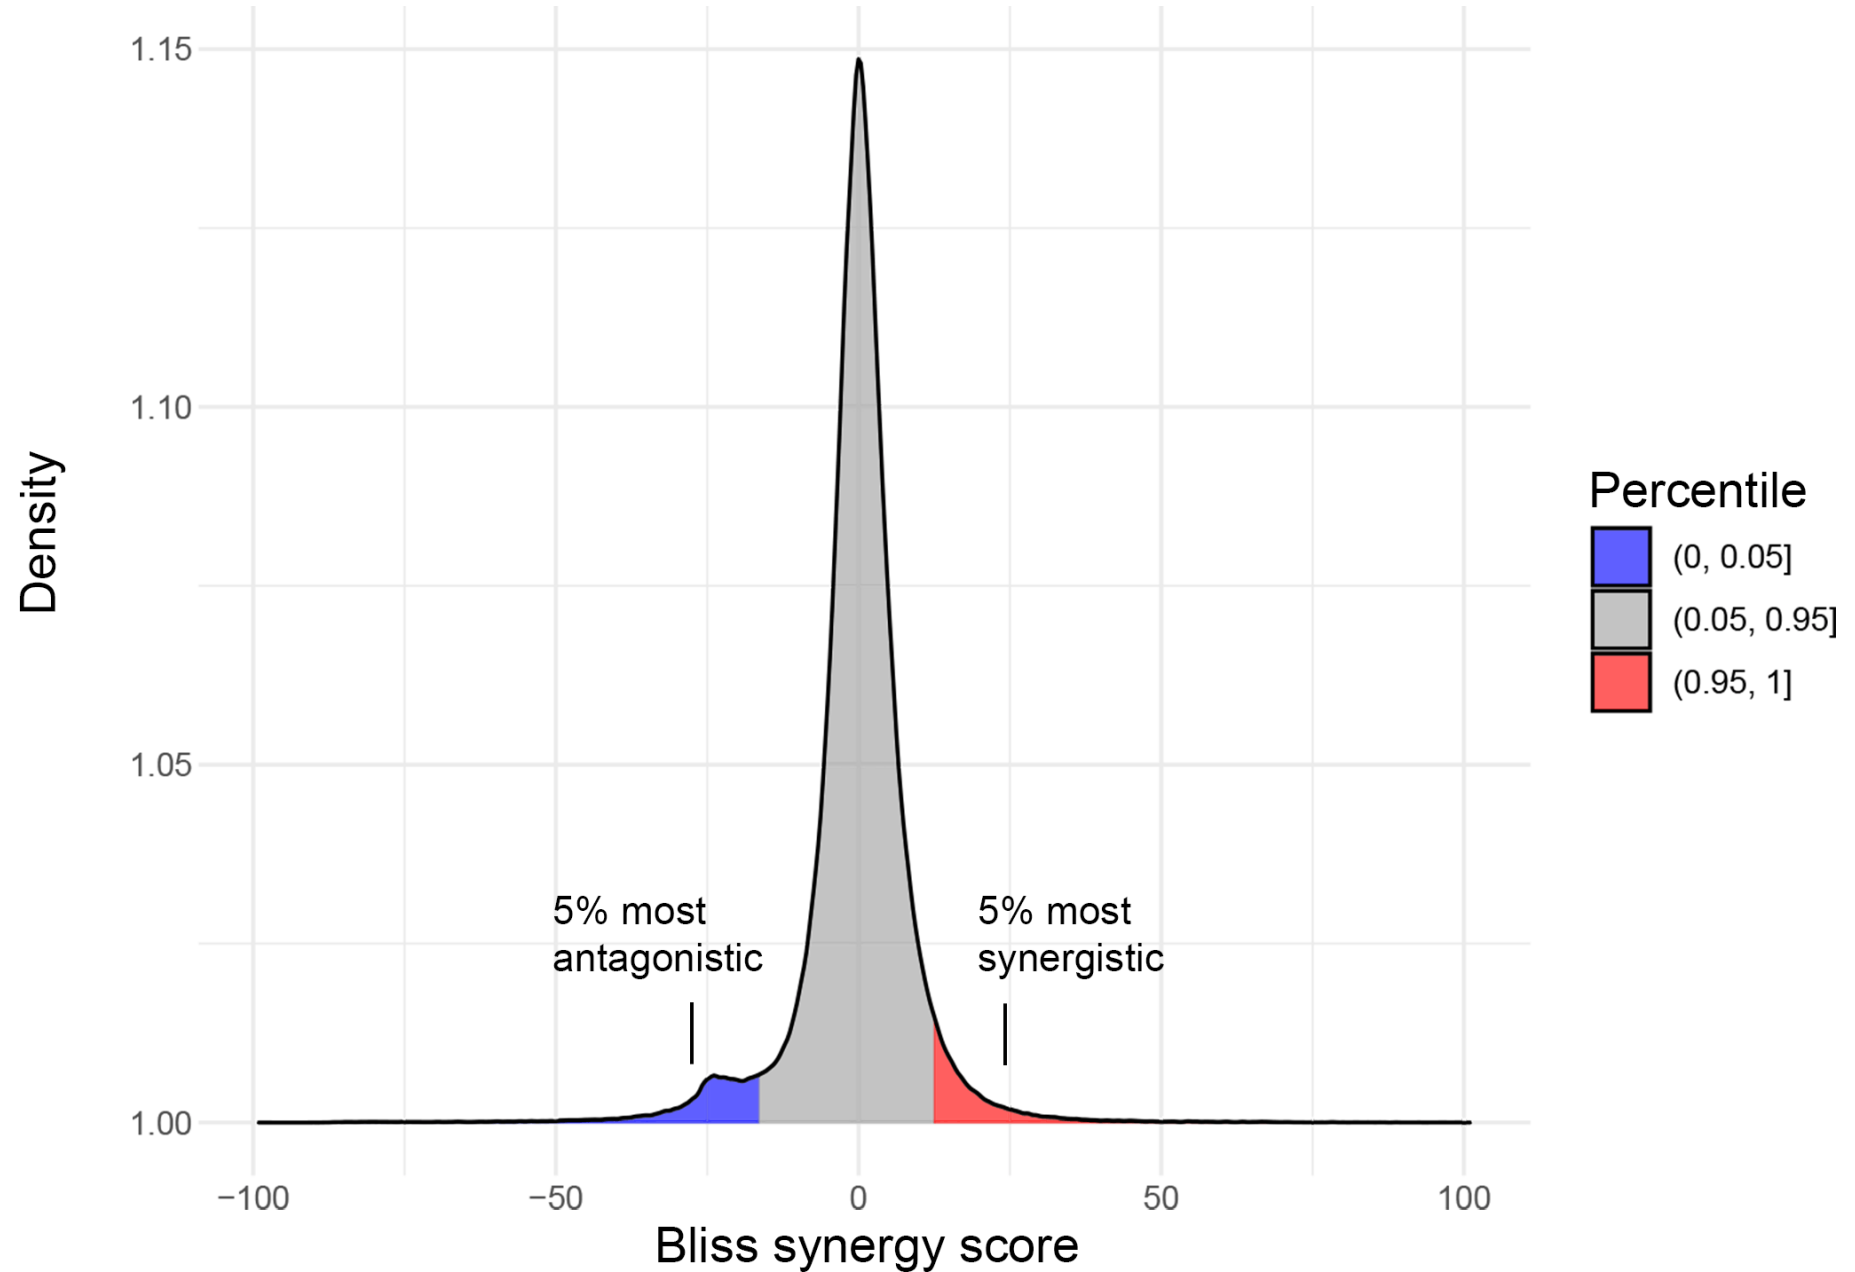

Supplement: AAC.01146-20-s0001.pdf [file AAC.01146-20-s0001.pdf]
